# Supplementary material for: Fabrication and characterization of PCL/CaCO3electrospun composite membrane for bone repair
Source: Royal Society of Chemistry journal article supplement (doi:10.1039/c5ra22548e), 2016-01-01
Supplement: c5ra22548e1.pdf [file c5ra22548e1.pdf]

Supporting information for

**Fabrication and characterization of PCL/CaCO<sub>3</sub> electrospun composite  
membrane for bone repair**

Zhinan Cao<sup>a,b</sup>, Dandan Wang<sup>a,b</sup>, Lingwei Lv<sup>a,b</sup>, Yihong Gong<sup>a,b,\*</sup>, Yan Li<sup>a,b,\*</sup>

<sup>a</sup>Department of Biomedical Engineering, School of Engineering, Sun Yat-sen University, Guangzhou, Guangdong, P.R. China

<sup>b</sup>Guangdong Provincial Key Laboratory of Sensor Technology and Biomedical Instrument, Sun Yat-sen University, Guangzhou, Guangdong, P.R. China

\*Corresponding author: Yihong Gong, Telephone: +86-20-39332146; Fax: +86-20-39332146; Email: [gongyh@mail.sysu.edu.cn](mailto:gongyh@mail.sysu.edu.cn)

Yan Li, Telephone: +86-20-39387890; Fax: +86-20-39387890; Email: [liyan99@mail.sysu.edu.cn](mailto:liyan99@mail.sysu.edu.cn)

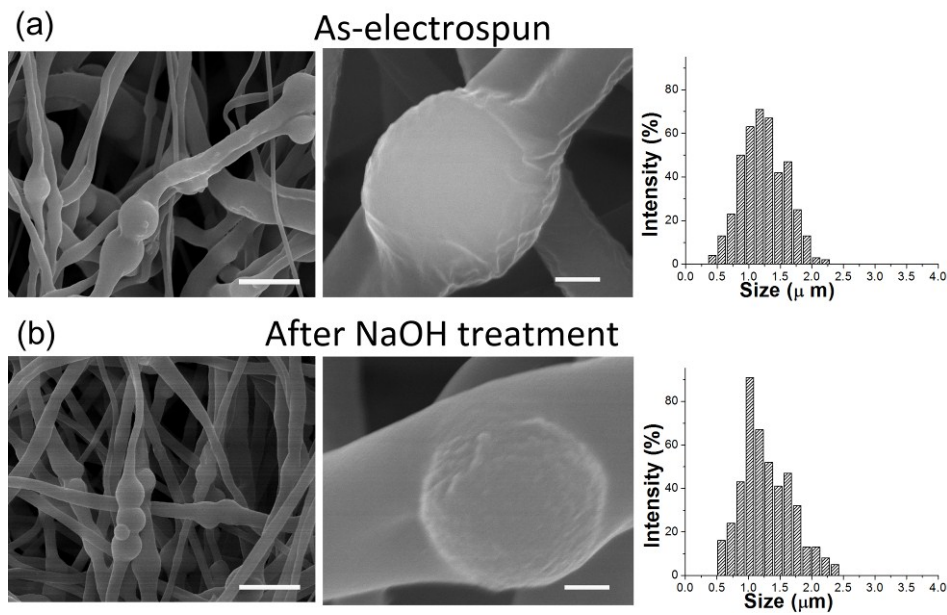

**Fig. S1.** SEM images and fiber diameter distribution of P-50 composite fibrous membranes before and after NaOH treatment. The scale bar in image at lower magnification is 4  $\mu\text{m}$  and is 500 nm in image at higher magnification.

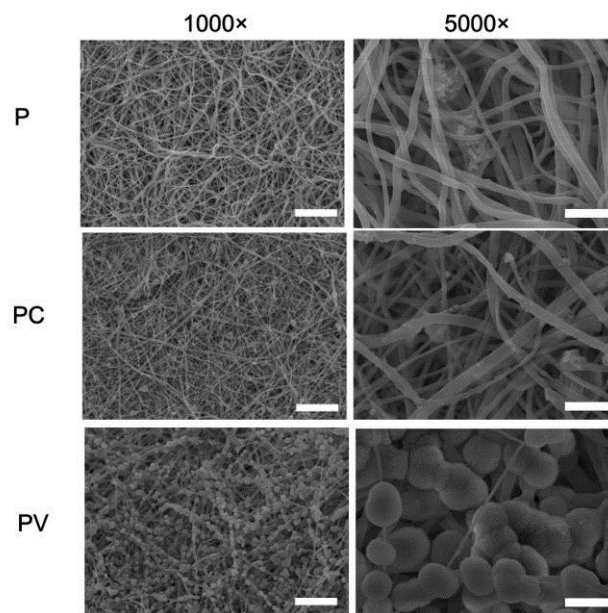

**Fig. S2.** Representative SEM images of composite fibrous membranes after soaking in SBF for 21 days. The left scale bar is 20  $\mu\text{m}$ , the right is 4  $\mu\text{m}$ . P is PCL fibrous membrane, PC is PCL composite membrane at calcite/PCL weight ratio of 50%, and PV is PCL composite membrane at vaterite/PCL weight ratio of 50%. Before soaking, the membranes were after NaOH treatment to expose the entrapped  $\text{CaCO}_3$ /casein microparticles and during the 21 days, SBF was not changed. There was significant more crystal deposition on PCL membrane with  $\text{CaCO}_3$ /casein than PCL membrane with calcite and PCL membrane.

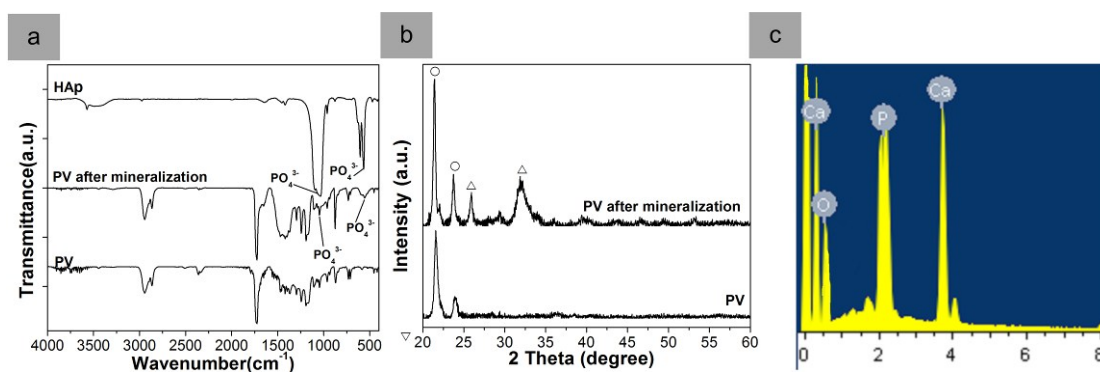

**Fig. S3.** (a) FTIR spectra of PV composite fibrous membranes before and after immersion in SBF for 21 days; (b) XRD patterns of PV membrane and PV membrane after incubated in SBF for 14 days, ○ indicating peaks belonging to PCL; (c) EDS spectrum of the agglomerates formed on the surface of PV composite fibrous membranes. After mineralization, two diffraction peaks indicated by Δ were present on XRD pattern, where these two peaks were assigning to hydroxyapatite (HAp)<sup>1,2</sup>; the absorption band of PO<sub>4</sub> was also observed on FTIR spectra<sup>3</sup>.

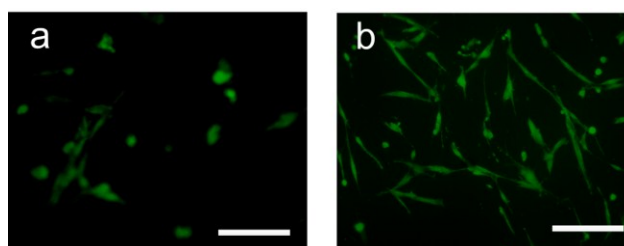

**Fig. S4.** Fluorescence microscope images of HMSCs growing on P-50 composite membranes for 5 days. (a) Before surface modification and (b) after surface modification. The scale bar is 200 μm.

## References

1. K. K. Gupta, A. Kundan, P. K. Mishra, P. Srivastava, S. Mohanty, N. K. Singh, A. Mishra and P. Maiti, *Physical Chemistry Chemical Physics*, 2012, **14**, 12844-12853.
2. S. Jalota, S. B. Bhaduri and A. C. Tas, *Journal of Materials Science-Materials in Medicine*, 2006, **17**, 697-707.
3. Z. Xu, G. Liang, L. Jin, Z. Wang, C. Xing, Q. Jiang and Z. Zhang, *Journal of Crystal Growth*, 2014, **395**, 116-122.
